# Supplementary material
Source: PubMed Central journal article supplement (PMC2596273)
Supplement: 0810104105_0810104105SI.pdf [file 0810104105_0810104105SI.pdf]

# Supporting Information

Shen *et al.* 10.1073/pnas.0810104105

Table S1. Proteins from 250k to 150k gel segments identified by more than two peptides in LC-MS/MS analyses

| Group                                 | Protein Name                                                 | Accession        | Score    | Peptides |
|---------------------------------------|--------------------------------------------------------------|------------------|----------|----------|
| BIG1 IP                               | Brefeldin A-inhibited guanine nucleotide-exchange protein 1  | 51479145         | 460      | 29       |
|                                       | Kinesin family member 21A                                    | 38569484         | 190      | 12       |
|                                       | ADP-ribosylation factor guanine nucleotide-exchange factor 2 | 5453573          | 180      | 11       |
|                                       | Ankyrin repeat domain protein 15 isoform a                   | 64464726         | 130      | 9        |
|                                       | Clathrin heavy chain 1                                       | 4758012          | 40       | 4        |
|                                       | Albumin precursor                                            | 4502027          | 70       | 4        |
|                                       | Kinesin family member 21B                                    | 83716024         | 60       | 3        |
|                                       | Desmoplakin isoform II                                       | 58530842         | 40       | 3        |
|                                       | Hornerin                                                     | 57864582         | 40       | 3        |
|                                       | IgG control                                                  | Lactotransferrin | 54607120 | 120      |
| LPLUNC1 protein precursor             |                                                              | 40807482         | 100      | 7        |
| Lysozyme precursor                    |                                                              | 4557894          | 40       | 3        |
| Prolactin-induced protein             |                                                              | 4505821          | 30       | 3        |
| Alpha 1 type I collagen preproprotein |                                                              | 110349772        | 30       | 3        |
| Hypothetical protein LOC124220        |                                                              | 94536866         | 30       | 2        |
| Caspase 14 precursor                  |                                                              | 6912286          | 30       | 2        |
| Clathrin heavy chain 1                |                                                              | 4758012          | 30       | 2        |
